# Supplementary material for: Dynamics of transition dipole moment orientation in representative fluorescent proteins
Source: Royal Society of Chemistry journal article supplement (doi:10.1039/d3cp01242e), 2023-01-01
Supplement: d3cp01242e1.pdf [file d3cp01242e1.pdf]

## ARTICLE

### Supplementary information

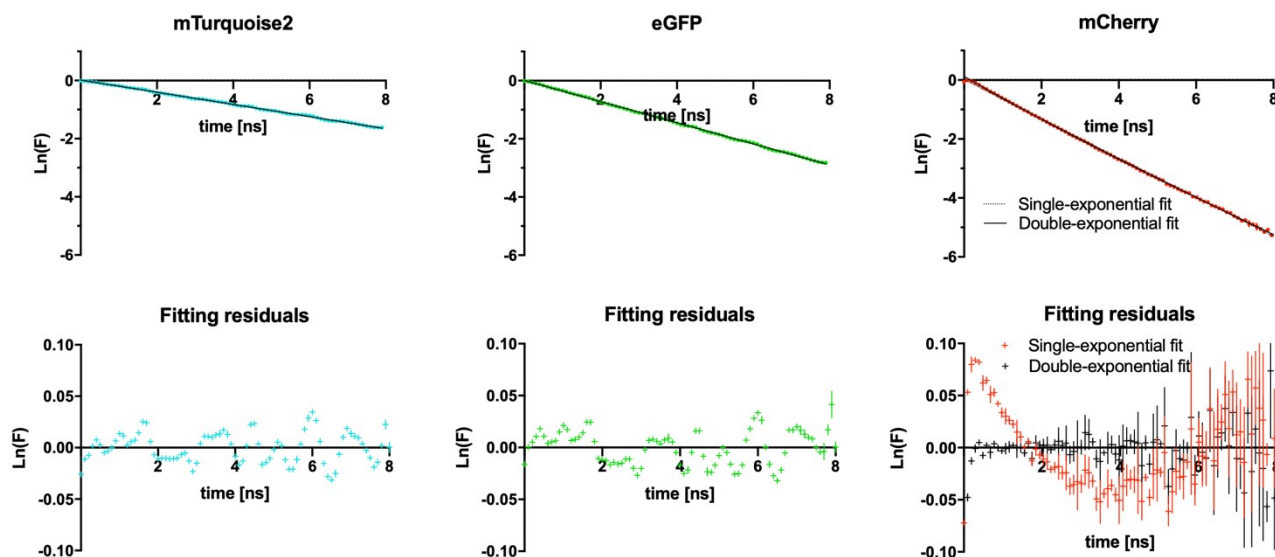

Supplementary Figure 1: Results of fitting time-resolved fluorescence intensity data. Linear fitting of logarithms of fluorescence intensities produced good fits for mTurquoise2 and eGFP but not for mCherry, as seen by the fitting residuals. For mCherry, a markedly better fit was obtained by using two exponential functions. Mean values and 95 % confidence intervals are shown in all plots.

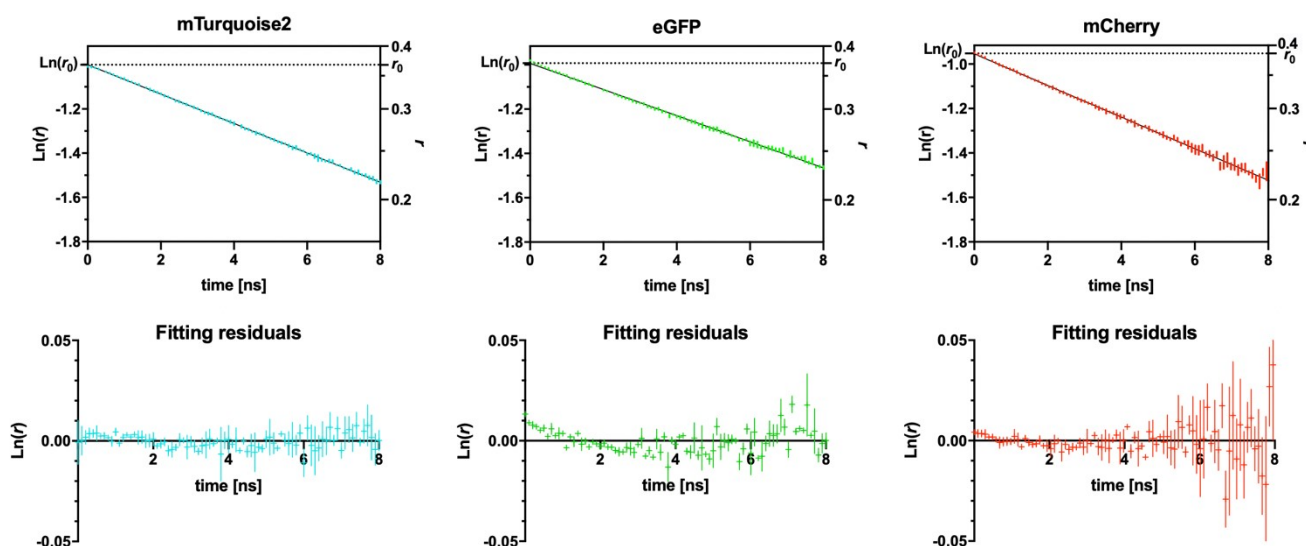

Supplementary Figure 2: Results of fitting time-resolved fluorescence anisotropy data. Linear fitting of logarithms of fluorescence anisotropy produced good fits for all three studied fluorescent proteins, as evidenced by the shown residuals. Mean values and 95 % confidence intervals are shown in all plots.

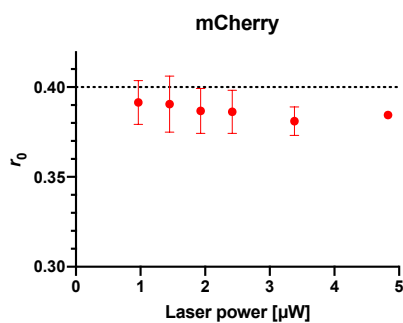

Supplementary Figure 3: Effects of laser power on determinations of initial fluorescence anisotropy ( $r_0$ ) in mCherry. Laser power 5  $\mu\text{W}$  yields the most precise results that do not statistically significantly deviate from results obtained with lower illumination intensities. Mean values and 95% confidence intervals are shown.

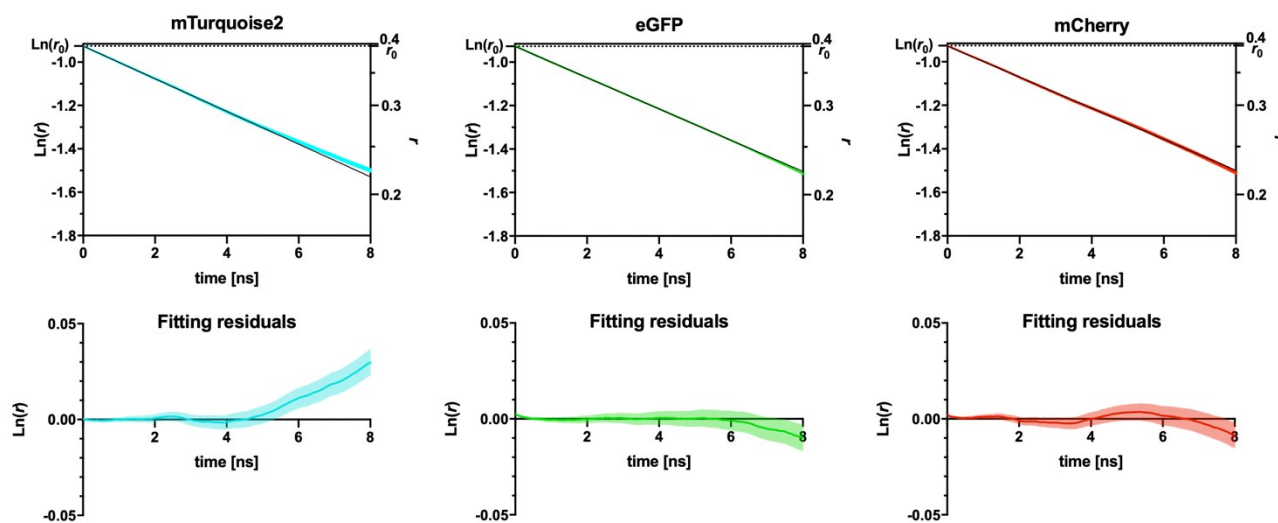

#### Instrument response functions

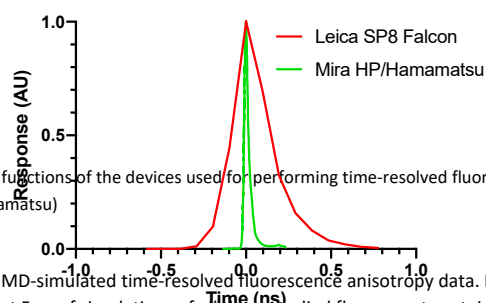

Supplementary Figure 5: Instrument response functions of the devices used for performing time-resolved fluorescence measurements of mTurquoise2 and eGFP (LeicaSP8 Falcon) and mCherry (Mira HP/Hamamatsu)

Supplementary Figure 4: Results of fitting of MD-simulated time-resolved fluorescence anisotropy data. Linear fitting of logarithms of fluorescence anisotropy ( $r$ ) produced good fits for the first 5 ns of simulations of all three studied fluorescent proteins, as evidenced by the shown residuals. Mean values and 95 % confidence intervals are shown in all plots.
